# Supplementary material for: Comparison of Risk for End-Stage Renal Disease Between Physicians and the General Population: A Nationwide Population-Based Cohort Study
Source: MDPI journal article supplement (doi:10.3390/ijerph16122211), 2019-06-22
Supplement: s1 [file s1]

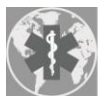

**Table S1.** Comparison of ESRD risk between physician cohort and comparison cohort (general population) among overall, different age subgroups, and sex using Firth's penalized likelihood approach logistic regression for the participants alive until the end of 2012.

|                      | Number of ESRD (%) | OR (95% CI)    | AOR (95% CI)*  | <i>p</i> value† |
|----------------------|--------------------|----------------|----------------|-----------------|
| Overall analysis     |                    |                |                |                 |
| Physician            | 51 (0.2)           | 0.5 (0.4–0.7)  | 0.5 (0.4–0.7)  | <0.001          |
| Comparison           | 207 (0.4)          | 1.0            | 1.0            |                 |
| Stratified analysis  |                    |                |                |                 |
| Age subgroup         |                    |                |                |                 |
| Younger (<35 years)  |                    |                |                |                 |
| Physician            | 1 (0.02)           | 0.3 (0.03–1.4) | 0.2 (0.03–1.1) | 0.083           |
| Comparison           | 9 (0.1)            | 1.0            | 1.0            |                 |
| Middle (35–64 years) |                    |                |                |                 |
| Physician            | 31 (0.1)           | 0.4 (0.2–0.5)  | 0.4 (0.3–0.6)  | <0.001          |
| Comparison           | 168 (0.4)          | 1.0            | 1.0            |                 |
| Older (≥65 years)    |                    |                |                |                 |
| Physician            | 19 (1.0)           | 1.2 (0.7–2.2)  | 1.2 (0.7–2.2)  | 0.509           |
| Comparison           | 30 (0.8)           | 1.0            | 1.0            |                 |
| Sex                  |                    |                |                |                 |
| Male                 |                    |                |                |                 |
| Physician            | 49 (0.2)           | 0.5 (0.4–0.7)  | 0.5 (0.4–0.7)  | <0.001          |
| Comparison           | 197 (0.4)          | 1.0            | 1.0            |                 |
| Female               |                    |                |                |                 |
| Physician            | 2 (0.05)           | 0.5 (0.1–1.6)  | 0.4 (0.1–1.4)  | 0.169           |
| Comparison           | 10 (0.1)           | 1.0            | 1.0            |                 |

ESRD, end-stage renal disease; AOR: adjusted odds ratio; CI: confidence interval; HTN, hypertension; DM, diabetes mellitus; CAD, coronary artery disease. \*Adjusted for age, sex, HTN, DM, hyperlipidemia, anemia, hyperuricemia, anemia, and CAD. †For AOR.
